# Supplementary material
Source: PubMed Central journal article supplement (PMC5009272)
Supplement: 10.1074_M116.736710_jbc.M116.736710-1.pdf [file 10.1074_M116.736710_jbc.M116.736710-1.pdf]

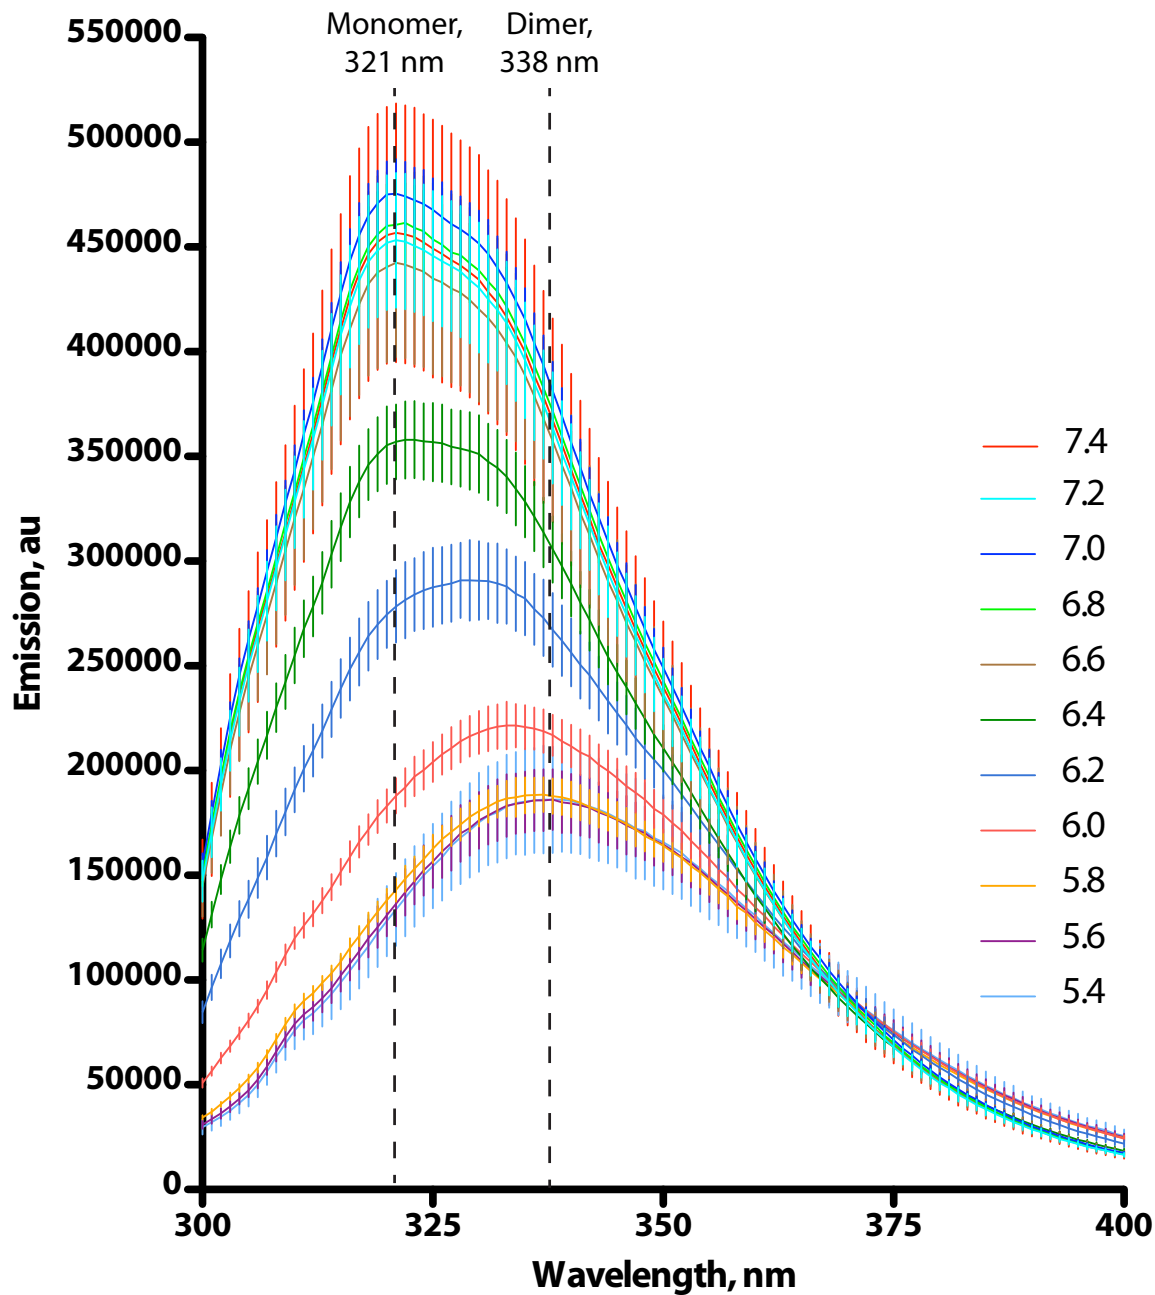

**Supplemental Figure 1 (Related to Figure 6), Tryptophan fluorescence raw data.** Each protein sample was excited at 280 nm and the emission spectra were recorded from 300-400 nm in 1 nm steps for each pH. The signal at 321 nm corresponded to monomer state, and the signal at 338 nm corresponded to the dimer state. The ratio of these two signals was used to compare the WT and mutants at each pH step. Three replicates were collected at each pH increment for each mutant and error bars correspond to standard error.
